# Supplementary material for: Climate change projections of maximum temperature in the pre-monsoon season in Bangladesh using statistical downscaling of global climate models
Source: Copernicus journal article supplement (doi:10.5194/asr-18-99-2021), 2021-07-13
Supplement: Supplementary file 1 [file asr-18-99-2021-supplement.pdf]

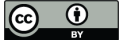

*Supplement of*

**Climate change projections of maximum temperature  
in the pre-monsoon season in Bangladesh using  
statistical downscaling of global climate models**

**M. Bazlur Rashid et al.**

*Correspondence to:* M. Bazlur Rashid (bazlur.rashid76@gmail.com)

The copyright of individual parts of the supplement might differ from the article licence.

5

## 10 **1 Observational stations**

Table S1 contains information about the observations stations from Bangladesh Meteorological Department (BMD) that were used in this study.

## **2 Global climate models**

15 Table S2 displays all the global climate model (GCM) simulations from the fifth Coupled Model Intercomparison Projection (CMIP5) that were used in this study. Three emission scenarios were considered: representative concentration pathways RCP2.6, RCP4.5, and RCP8.5.

**Table S1: Information on the stations in Bangladesh where the daily maximum temperature observations used in this study were taken. The table includes the station id number, geographical information (longitude, latitude and elevation) and the mean and trend of the maximum temperature in the pre-monsoon season based on observations from 1981-2016.**

| Region     | Station name   | WMO ID | Latitude (°N) | Longitude (°E) | Elevation (m) | tmax (°C) |                   | tmax trend (°C/dec.) |
|------------|----------------|--------|---------------|----------------|---------------|-----------|-------------------|----------------------|
|            |                |        |               |                |               | Mar-May   | Mar-May 1981-2017 |                      |
| Dhaka      | Dhaka          | 41923  | 23.783        | 90.38333       | 8.45          | 33.27     | 0.25              |                      |
|            | Tangail        | 41909  | 24.25         | 89.93333       | 10.2          | 33.12     | 0.35              |                      |
|            | Faridpur       | 41929  | 23.6          | 89.85          | 8.1           | 33.62     | 0.33              |                      |
|            | Madaripur      | 41939  | 23.16667      | 90.18333       | 7             | 33.61     | 0.09              |                      |
| Mymensingh | Mymensingh     | 41886  | 24.733        | 90.4166        | 18            | 31.46     | 0.04              |                      |
| Chattogram | Chattogram     | 41978  | 22.216        | 91.8           | 5.5           | 31.72     | 0.21              |                      |
|            | Cox's Bazar    | 41992  | 21.45         | 91.96667       | 2.1           | 32.43     | 0.53              |                      |
|            | Chandpur       | 41941  | 23.2333       | 90.7           | 4.88          | 32.81     | 0.5               |                      |
|            | Comilla        | 41933  | 23.43333      | 91.18333       | 7.5           | 32.05     | 0.35              |                      |
|            | Feni           | 41943  | 23.0333       | 91.41667       | 6.4           | 32.1      | 0.28              |                      |
|            | Hatiya         | 41963  | 22.45         | 91.1           | 2.44          | 31.9      | 0.33              |                      |
|            | Kutubdia       | 41989  | 21.81667      | 91.85          | 2.74          | 31.47     | 0.33              |                      |
|            | Majidi Court   | 41953  | 22.86667      | 91.1           | 4.87          | 32.58     | 0.65              |                      |
|            | Rangamati      | 41966  | 22.6333       | 92.15          | 68.89         | 33        | 0.58              |                      |
|            | Sandwip        | 41964  | 22.48333      | 91.43333       | 2.1           | 31.4      | 0.67              |                      |
|            | Sitakunda      | 41965  | 22.6333       | 91.7           | 7.3           | 32.16     | 0.68              |                      |
|            | Teknaf         | 41998  | 20.86667      | 92.3           | 5             | 31.87     | 0.18              |                      |
| Khulna     | Khulna         | 41947  | 22.78333      | 89.5333        | 2.1           | 34.2      | 0.35              |                      |
|            | Jessore        | 41936  | 23.2          | 89.3333        | 6.1           | 34.94     | 0.35              |                      |
|            | Satkhira       | 41946  | 22.7166       | 89.08333       | 3.96          | 34.42     | 0.01              |                      |
| Barishal   | Barishal       | 41950  | 22.7166       | 90.36667       | 2.1           | 33.18     | 0.31              |                      |
|            | Patuakhali     | 41960  | 22.33333      | 90.33333       | 1.5           | 33.21     | 0.67              |                      |
|            | Bhola          | 41951  | 22.68333      | 90.65          | 4.3           | 32.68     | 0.23              |                      |
|            | Khepupara      | 41984  | 21.98333      | 90.23333       | 1.83          | 32.66     | 0.53              |                      |
| Rajshahi   | Rajshahi       | 41895  | 24.36667      | 88.7           | 19.5          | 34.83     | 0.08              |                      |
|            | Bogra          | 41883  | 24.85         | 89.36667       | 17.9          | 32.84     | 0.08              |                      |
|            | Ishurdi        | 41907  | 24.15         | 89.0333        | 12.9          | 34.39     | 0.17              |                      |
| Rangpur    | Rangpur        | 41859  | 25.73333      | 89.2666        | 32.61         | 31.32     | 0.04              |                      |
|            | Dinajpur       | 41863  | 25.65         | 88.68333       | 37.58         | 32.17     | 0.09              |                      |
| Sylhet     | Sylhet         | 41891  | 24.9          | 91.88333       | 33.53         | 31.13     | 0.58              |                      |
|            | Srimangal      | 41915  | 24.3          | 91.73333       | 21.95         | 32.3      | 0.18              |                      |
|            | <b>Average</b> |        |               |                |               | 32.8      | 0.3               |                      |

25 Table S2: GCM simulations used in this study (rip = realization, initialization, physics version).

| Model ID       | Simulations (realization, initialization method, physics version)         |                                                                                                                                 |                                                                           |
|----------------|---------------------------------------------------------------------------|---------------------------------------------------------------------------------------------------------------------------------|---------------------------------------------------------------------------|
|                | RCP2.6                                                                    | RCP4.5                                                                                                                          | RCP8.5                                                                    |
| ACCESS1-0      | ---                                                                       | r1i1p1                                                                                                                          | r1i1p1                                                                    |
| ACCESS1.3      | ---                                                                       | r1i1p1                                                                                                                          | r1i1p1                                                                    |
| bcc-csm1-1     | r1i1p1                                                                    | r1i1p1                                                                                                                          | r1i1p1                                                                    |
| bcc-csm1-1-m   | r1i1p1                                                                    | r1i1p1                                                                                                                          | ---                                                                       |
| BNU-ESM        | r1i1p1                                                                    | r1i1p1                                                                                                                          | r1i1p1                                                                    |
| CanESM2        | r1i1p1 r2i1p1 r3i1p1 r4i1p1 r5i1p1                                        | r1i1p1 r2i1p1 r3i1p1 r4i1p1 r5i1p1                                                                                              | r1i1p1 r2i1p1 r3i1p1 r4i1p1 r5i1p1                                        |
| CCSM4          | r1i1p1 r2i1p1 r3i1p1 r4i1p1 r5i1p1<br>r6i1p1                              | r1i1p1 r2i1p1 r3i1p1 r4i1p1 r5i1p1<br>r6i1p1                                                                                    | r1i1p1 r2i1p1 r3i1p1 r4i1p1 r5i1p1<br>r6i1p1                              |
| CESM1-BGC      | ---                                                                       | r1i1p1                                                                                                                          | r1i1p1                                                                    |
| CESM1-CAM5     | r1i1p1 r2i1p1 r3i1p1                                                      | r1i1p1 r2i1p1 r3i1p1                                                                                                            | r1i1p1 r2i1p1 r3i1p1                                                      |
| CMCC-CM        | ---                                                                       | r1i1p1                                                                                                                          | r1i1p1                                                                    |
| CMCC-CMS       | ---                                                                       | r1i1p1                                                                                                                          | r1i1p1                                                                    |
| CNRM-CM5       | r1i1p1                                                                    | r1i1p1                                                                                                                          | r1i1p1 r2i1p1 r4i1p1 r6i1p1 r10i1p1                                       |
| CSIRO-Mk3-6-0  | r1i1p1 r2i1p1 r3i1p1 r4i1p1 r5i1p1<br>r6i1p1 r7i1p1 r8i1p1 r9i1p1 r10i1p1 | r1i1p1 r2i1p1 r3i1p1 r4i1p1 r5i1p1<br>r6i1p1 r7i1p1 r8i1p1 r9i1p1 r10i1p1                                                       | r1i1p1 r2i1p1 r3i1p1 r4i1p1 r5i1p1<br>r6i1p1 r7i1p1 r8i1p1 r9i1p1 r10i1p1 |
| EC-EARTH       | r1i1p1 r8i1p1                                                             | r1i1p1 r2i1p1 r6i1p1 r8i1p1 r9i1p1<br>r12i1p1                                                                                   | r1i1p1 r1i1p1 r8i1p1                                                      |
| FGOALS_g2      | r1i1p1                                                                    | r1i1p1                                                                                                                          | r1i1p1                                                                    |
| FIO-ESM        | r1i1p1 r2i1p1 r3i1p1                                                      | r1i1p1 r2i1p1 r3i1p1                                                                                                            | r1i1p1 r2i1p1 r3i1p1                                                      |
| GFDL-CM3       | r1i1p1                                                                    | r1i1p1                                                                                                                          | r1i1p1                                                                    |
| GFDL-ESM2G     | r1i1p1                                                                    | r1i1p1                                                                                                                          | r1i1p1                                                                    |
| GFDL-ESM2M     | r1i1p1                                                                    | r1i1p1                                                                                                                          | r1i1p1                                                                    |
| GISS-E2-H      | r1i1p1 r1i1p2 r1i1p3                                                      | r1i1p1 r2i1p1 r3i1p1 r4i1p1 r5i1p1<br>r1i1p2 r2i1p2 r3i1p2 r4i1p2 r5i1p2<br>r1i1p3 r2i1p3 r3i1p3 r4i1p3 r5i1p3                  | r1i1p1 r1i1p2 r1i1p3                                                      |
| GISS-E2-H-CC   | ---                                                                       | r1i1p1                                                                                                                          | ---                                                                       |
| GISS-E2-R      | r1i1p1 r1i1p2 r1i1p3                                                      | r1i1p1 r2i1p1 r3i1p1 r4i1p1 r5i1p1<br>r6i1p1 r1i1p2 r2i1p2 r3i1p2 r4i1p2<br>r5i1p2 r1i1p3 r2i1p3 r3i1p3 r4i1p3<br>r5i1p3 r6i1p3 | r1i1p1 r1i1p2 r1i1p3                                                      |
| GISS-E2-R-CC   | ---                                                                       | r1i1p1                                                                                                                          | ---                                                                       |
| HadGEM2-AO     | r1i1p1                                                                    | r1i1p1                                                                                                                          | r1i1p1                                                                    |
| HadGEM2-CC     | ---                                                                       | r1i1p1                                                                                                                          | r1i1p1                                                                    |
| HadGEM2-ES     | r1i1p1 r2i1p1 r3i1p1 r4i1p1                                               | r2i1p1 r3i1p1 r4i1p1                                                                                                            | r2i1p1 r3i1p1 r4i1p1                                                      |
| inmcm4         | ---                                                                       | r1i1p1                                                                                                                          | r1i1p1                                                                    |
| IPSL-CM5A-LR   | r1i1p1 r2i1p1 r3i1p1 r4i1p1                                               | r1i1p1 r2i1p1 r3i1p1 r4i1p1                                                                                                     | r1i1p1 r2i1p1 r3i1p1 r4i1p1                                               |
| IPSL-CM5A-MR   | r1i1p1                                                                    | r1i1p1                                                                                                                          | r1i1p1                                                                    |
| IPSL-CM5B-LR   | ---                                                                       | r1i1p1                                                                                                                          | r1i1p1                                                                    |
| MIROC5         | r1i1p1 r2i1p1 r3i1p1                                                      | r1i1p1 r2i1p1 r3i1p1                                                                                                            | r1i1p1 r2i1p1 r3i1p1                                                      |
| MIROC-ESM      | r1i1p1                                                                    | r1i1p1                                                                                                                          | r1i1p1                                                                    |
| MIROC-ESM-CHEM | r1i1p1                                                                    | r1i1p1                                                                                                                          | r1i1p1                                                                    |
| MPI-ESM-LR     | r1i1p1 r2i1p1 r3i1p1                                                      | r1i1p1 r2i1p1 r3i1p1                                                                                                            | r1i1p1 r2i1p1 r3i1p1                                                      |
| MPI-ESM-MR     | r1i1p1                                                                    | r1i1p1 r2i1p1 r3i1p1                                                                                                            | r1i1p1                                                                    |
| MRI-CGCM3      | r1i1p1                                                                    | r1i1p1                                                                                                                          | r1i1p1                                                                    |
| NorESM1-M      | r1i1p1                                                                    | r1i1p1                                                                                                                          | r1i1p1                                                                    |
